# Supplementary material for: Critical soil moisture thresholds of plant water stress in terrestrial ecosystems
Source: PubMed Central journal article supplement — Sci Adv. 2022 Nov 4;8(44):eabq7827. doi: 10.1126/sciadv.abq7827 (PMC9635832; doi:10.1126/sciadv.abq7827), 2022-11-04
Supplement: sciadv.abq7827_sm.pdf [file sciadv.abq7827_sm.pdf]

Supplementary Materials for  
**Critical soil moisture thresholds of plant water stress in terrestrial ecosystems**

Zheng Fu *et al.*

Corresponding author: Zheng Fu, zheng.fu@lsce.ipsl.fr

*Sci. Adv.* **8**, eabq7827 (2022)  
DOI: 10.1126/sciadv.abq7827

**This PDF file includes:**

Figs. S1 to S10  
Tables S1 to S2

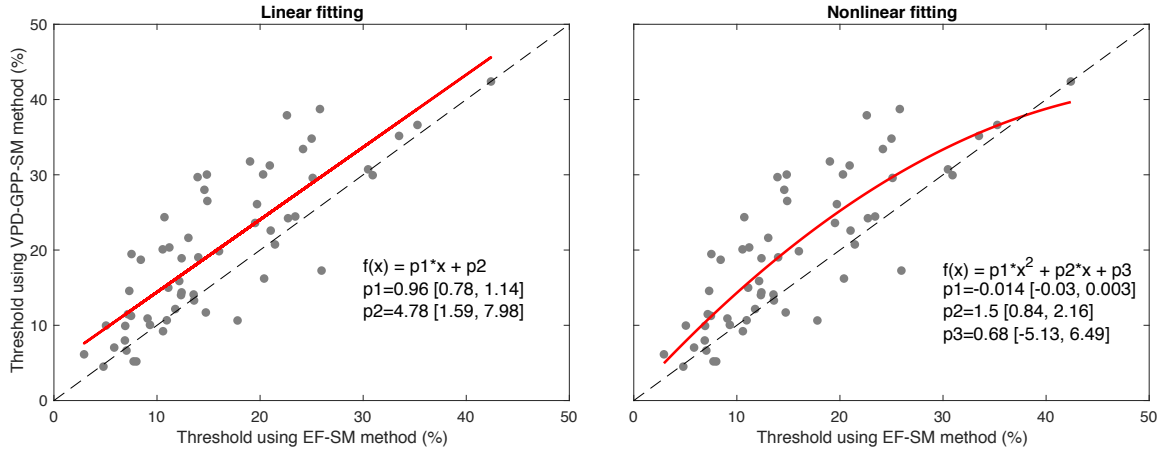

**Fig. S1.** Fitting the soil moisture thresholds from EF–SM method and VPD–GPP–SM method using linear ( $f(x) = p1 \times x + p2$ ) and nonlinear ( $f(x) = p1 \times x^2 + p2 \times x + p3$ ) functions. The 95% confidence intervals are shown in parenthesis.

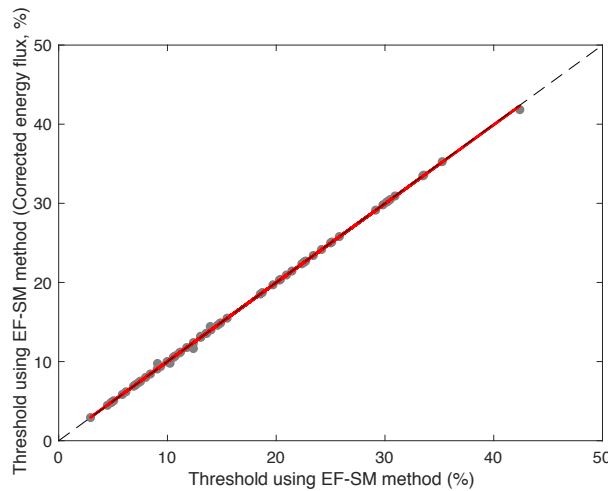

**Fig. S2.** The effect of different energy fluxes (LE and H vs. LE.CORR and H.CORR ) on SM thresholds estimated from EF–SM method across all sites with corrected energy fluxes. Both the ‘LE’ (or ‘H’) and ‘LE.CORR’ (or ‘H.CORR’) variables were reported by the FLUXNET database for latent (or sensible) energy exchange. LE.CORR and H.CORR are the “energy balance corrected” version of latent and sensible heat flux, based on the assumption that the Bowen ratio is correct.

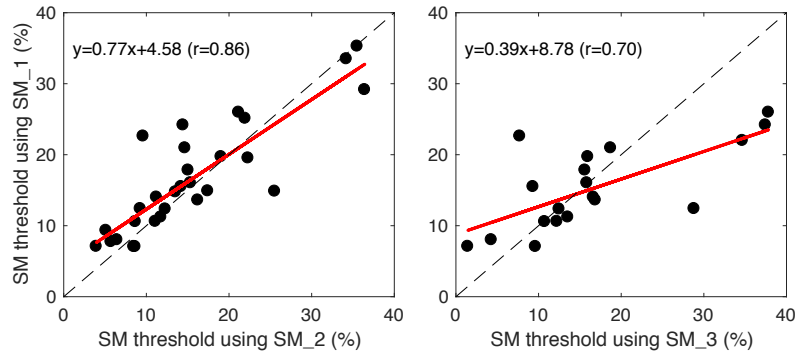

**Fig. S3.** Relationships between estimated SM thresholds using the SM in the first depth (SM<sub>1</sub>) and the SM in second (SM<sub>2</sub>) or third depth (SM<sub>3</sub>) provided by each research site.

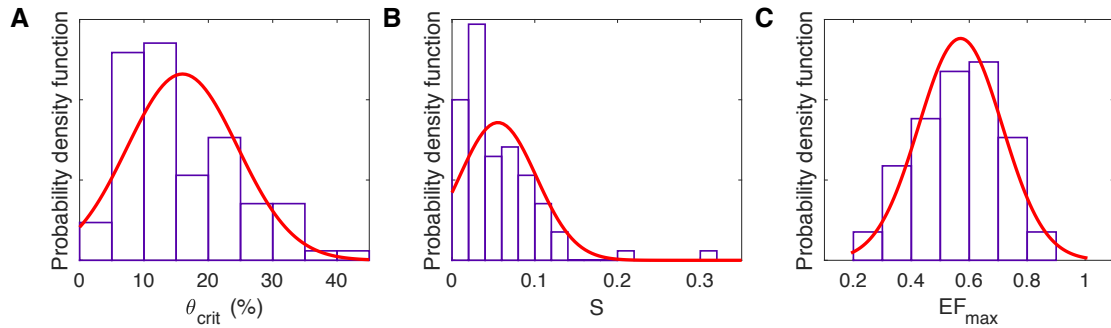

**Fig. S4.** Probability distributions of  $\theta_{crit}$ ,  $S$  and  $EF_{max}$  across all sites (A-C).

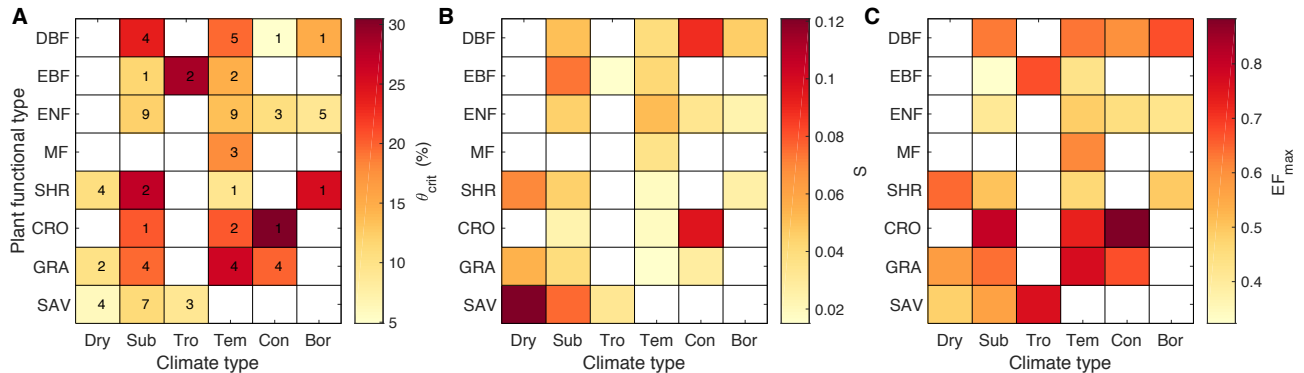

**Fig. S5.** Values of  $\theta_{crit}$ ,  $S$  and  $EF_{max}$  in a matrix of plant functional types and climate types. The number in the first panel indicates the number of sites in each bin. SAV: savannas; SHR: shrublands; ENF: evergreen needleleaf forests; EBF: evergreen broadleaf forests; DBF: deciduous broadleaf forests; MF: mixed forests; GRA: grasslands; CRO: croplands. Sub: sub-tropical; Tro: tropical; Tem: temperate; Con: continental; Bor: boreal.

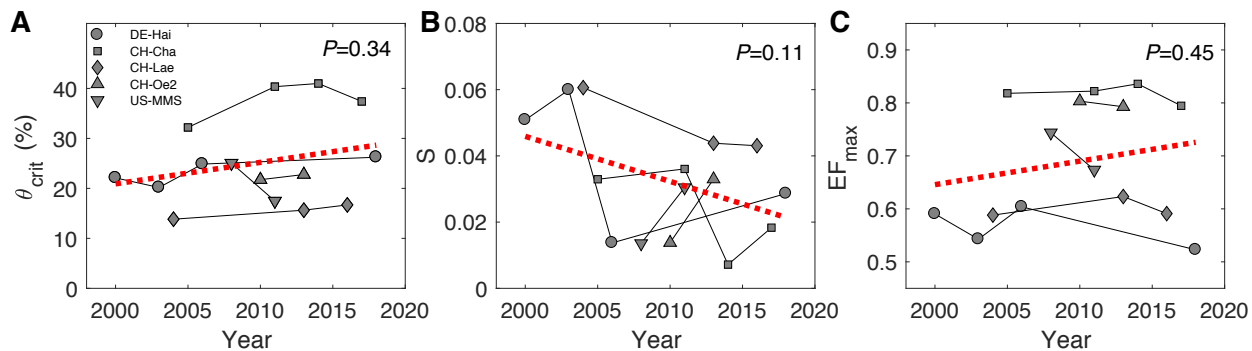

**Fig. S6.** The temporal change of  $\theta_{crit}$ ,  $S$  and  $EF_{max}$  at five sites with at least 15 years of measurements (A-C). The red line represents the linear fitting over all site-years. Different sites were shown in different marks.  $P$  values indicate statistical significance of the linear trend.

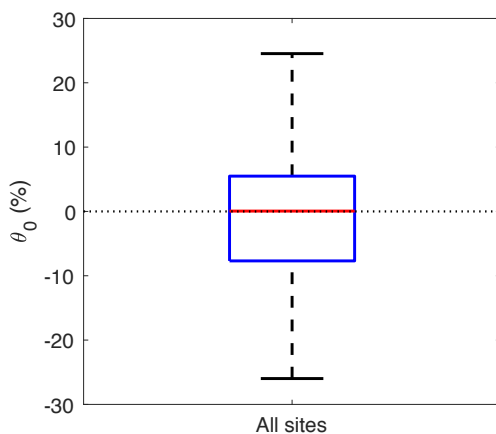

**Fig. S7.** Values of  $\theta_0$  (the value of SM at which EF equals zero) across sites. The  $\theta_0$  is not significantly differ from zero ( $P > 0.05$ ).

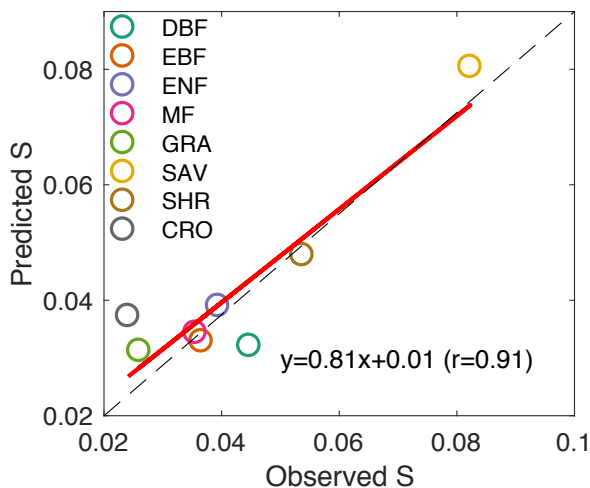

**Fig. S8.** The relationship between observed and predicted  $S$  across biomes.

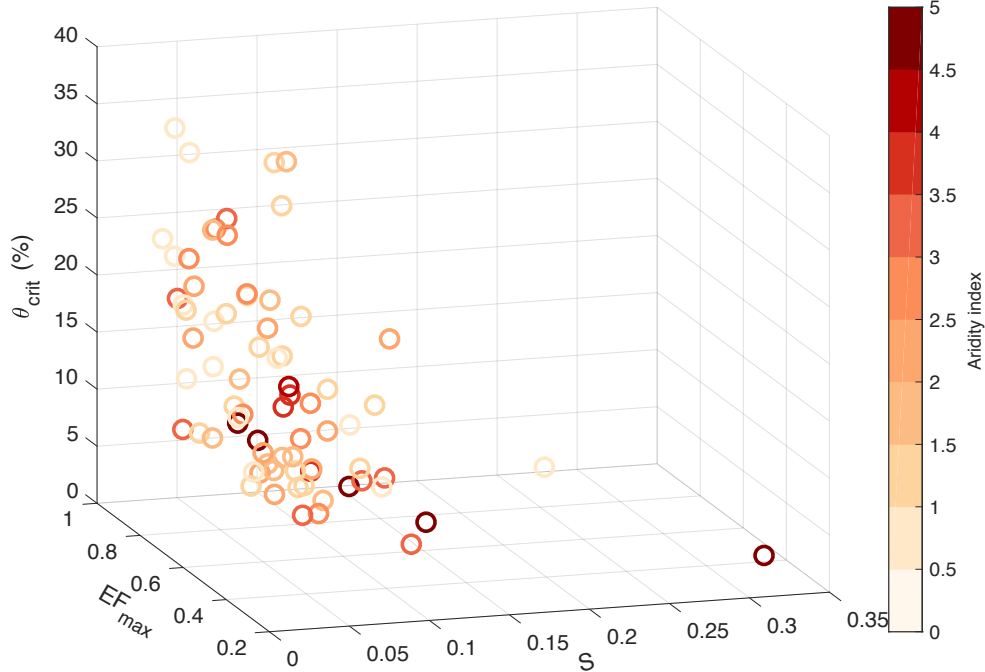

**Fig. S9.** The distribution of  $\theta_{\text{crit}}$ ,  $S$  and  $EF_{\text{max}}$  across all sites with aridity index.

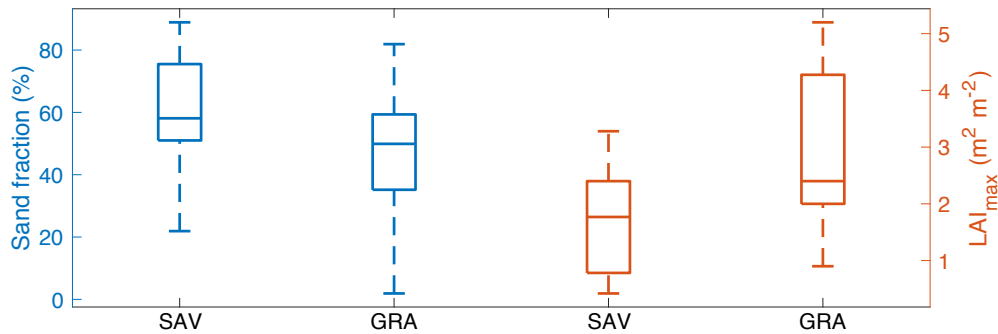

**Fig. S10.** Sand fraction and maximum leaf area index ( $LAI_{\text{max}}$ ) in savannas and grasslands. Both sand fraction and  $LAI_{\text{max}}$  in savannas (SAV) and grasslands (GRA) are significantly different (Kruskal-Wallis test,  $P < 0.05$ ). For each box plot, the middle line indicates the median; the box indicates the upper and lower quartiles, and the whiskers indicate the 5th and 95th percentiles of the data.

**Table S1.** Eddy covariance sites used in this study. Site identifier (ID), latitude (Lat, °), longitude (Long, °), plant functional type (PFT), climate type, and study periods are listed. Plant functional types were defined according to the IGBP classification, including SAV (savannas); SHR (shrublands); ENF (evergreen needleleaf forests); EBF (evergreen broadleaf forests); DBF (deciduous broadleaf forests); MF (mixed forests); GRA (grasslands) and CRO (croplands). Climate types were defined according to the Köppen-Geiger classification.

| Site ID | Lat    | Long   | PFT | Climate | Periods   |
|---------|--------|--------|-----|---------|-----------|
| AU-ASM  | -22.28 | 133.25 | SAV | bsh     | 2010-2014 |
| AU-Cpr  | -34.00 | 140.59 | SAV | bsk     | 2010-2014 |

---

|        |        |         |     |     |           |
|--------|--------|---------|-----|-----|-----------|
| AU-DaS | -14.16 | 131.39  | SAV | aw  | 2008-2014 |
| AU-Dry | -15.26 | 132.37  | SAV | aw  | 2008-2014 |
| AU-Gin | -31.38 | 115.71  | SAV | csa | 2011-2014 |
| AU-How | -12.49 | 131.15  | SAV | aw  | 2001-2014 |
| AU-Rig | -36.65 | 145.58  | GRA | cfb | 2011-2014 |
| AU-Whr | -36.67 | 145.03  | EBF | cfb | 2011-2014 |
| AU-Wom | -37.42 | 144.09  | EBF | cfb | 2010-2014 |
| BE-Bra | 51.31  | 4.52    | MF  | cfb | 2012-2019 |
| BE-Maa | 50.98  | 5.63    | SHR | cfb | 2016-2020 |
| CA-Ca2 | 49.87  | -125.29 | ENF | cfb | 1999-2010 |
| CA-Ca3 | 49.53  | -124.90 | ENF | cfb | 2001-2010 |
| CA-NS6 | 55.92  | -98.96  | SHR | dfc | 2001-2005 |
| CA-Oas | 53.63  | -106.20 | DBF | dfc | 1997-2010 |
| CA-Qfo | 49.69  | -74.34  | ENF | dfc | 2003-2010 |
| CA-SF2 | 54.25  | -105.88 | ENF | dfc | 2001-2006 |
| CA-SJ2 | 53.95  | -104.65 | ENF | dfc | 2002-2010 |
| CA-TP1 | 42.66  | -80.56  | ENF | dfb | 2002-2014 |
| CA-TPD | 42.64  | -80.56  | DBF | dfb | 2012-2014 |
| CH-Cha | 47.21  | 8.41    | GRA | cfb | 2005-2020 |
| CH-Dav | 46.82  | 9.86    | ENF | cfb | 2006-2014 |
| CH-Lae | 47.48  | 8.37    | MF  | cfb | 2004-2020 |
| CH-Oe1 | 47.29  | 7.73    | GRA | cfb | 2002-2008 |
| CH-Oe2 | 47.29  | 7.73    | CRO | cfb | 2004-2018 |
| CN-Cng | 44.59  | 123.51  | GRA | dwa | 2007-2010 |
| CN-Dan | 30.50  | 91.07   | GRA | dwc | 2004-2005 |
| CN-Du2 | 42.05  | 116.28  | GRA | dwb | 2006-2008 |
| CN-Du3 | 42.06  | 116.28  | GRA | dwb | 2009-2010 |
| CN-Qia | 26.74  | 115.06  | ENF | cfa | 2003-2005 |
| CZ-Lnz | 48.68  | 16.95   | MF  | cfb | 2015-2020 |
| CZ-RAJ | 49.44  | 16.70   | ENF | cfb | 2012-2018 |
| DE-Gri | 50.95  | 13.51   | GRA | cfb | 2007-2020 |
| DE-Hai | 51.08  | 10.45   | DBF | cfb | 2000-2020 |
| DE-HoH | 52.09  | 11.22   | DBF | cfb | 2015-2020 |
| DE-Hzd | 50.96  | 13.49   | DBF | cfb | 2010-2020 |
| DE-Kli | 50.89  | 13.52   | CRO | cfb | 2005-2018 |
| DE-Lnf | 51.33  | 10.37   | DBF | cfb | 2002-2012 |
| DE-Obe | 50.79  | 13.72   | ENF | cfb | 2008-2020 |
| ES-Abr | 38.70  | -6.79   | SAV | csa | 2015-2018 |
| ES-LM1 | 39.94  | -5.78   | SAV | csa | 2014-2020 |
| ES-LM2 | 39.93  | -5.78   | SAV | csa | 2014-2020 |

---

---

|        |       |         |     |     |           |
|--------|-------|---------|-----|-----|-----------|
| FR-Bil | 44.49 | -0.96   | ENF | cfb | 2014-2020 |
| FR-Hes | 48.67 | 7.06    | DBF | cfb | 2014-2020 |
| FR-LBr | 44.72 | -0.77   | ENF | cfb | 1996-2008 |
| GF-Guy | 5.28  | -52.92  | EBF | am  | 2004-2014 |
| IT-BFt | 45.20 | 10.74   | DBF | cfa | 2019-2020 |
| IT-CA1 | 42.38 | 12.03   | DBF | csa | 2011-2014 |
| IT-Col | 41.85 | 13.59   | DBF | csa | 2006-2014 |
| IT-Cpz | 41.71 | 12.38   | EBF | csa | 1997-2009 |
| IT-Lsn | 45.74 | 12.75   | SHR | cfa | 2016-2020 |
| IT-Noe | 40.61 | 8.15    | SHR | csa | 2004-2014 |
| IT-SRo | 43.73 | 10.28   | ENF | csa | 1999-2012 |
| MY-PSO | 2.97  | 102.31  | EBF | af  | 2003-2009 |
| NL-Loo | 52.17 | 5.74    | ENF | cfb | 1999-2016 |
| RU-Fyo | 56.46 | 32.92   | ENF | dfb | 2007-2017 |
| SE-Htm | 56.10 | 13.42   | ENF | cfb | 2015-2020 |
| SE-Nor | 60.09 | 17.48   | ENF | dfb | 2014-2020 |
| SE-Ros | 64.17 | 19.74   | ENF | dfc | 2014-2020 |
| SN-Dhr | 15.40 | -15.43  | SAV | bwh | 2010-2013 |
| US-AR1 | 36.43 | -99.42  | GRA | cfa | 2009-2012 |
| US-Dk1 | 35.97 | -79.09  | GRA | cfa | 2001-2008 |
| US-Dk3 | 35.98 | -79.09  | ENF | cfa | 2001-2008 |
| US-FR2 | 29.95 | -98.00  | SAV | cfa | 2005-2008 |
| US-Fmf | 35.14 | -111.73 | ENF | csb | 2005-2010 |
| US-Fuf | 35.09 | -111.76 | ENF | csb | 2005-2010 |
| US-GLE | 41.37 | -106.24 | ENF | dfc | 2004-2014 |
| US-Goo | 34.25 | -89.87  | GRA | cfa | 2002-2006 |
| US-MMS | 39.32 | -86.41  | DBF | cfa | 1999-2014 |
| US-Me1 | 44.58 | -121.50 | ENF | csb | 2004-2005 |
| US-Me3 | 44.32 | -121.61 | ENF | csb | 2004-2009 |
| US-Me4 | 44.50 | -121.62 | ENF | csb | 1996-2000 |
| US-Me6 | 44.32 | -121.61 | ENF | csb | 2010-2014 |
| US-Rls | 43.14 | -116.74 | SHR | bsh | 2014-2017 |
| US-Rms | 43.06 | -116.75 | SHR | bsh | 2014-2017 |
| US-Ro5 | 44.69 | -93.06  | CRO | dfa | 2017-2017 |
| US-SRG | 31.79 | -110.83 | GRA | bsk | 2008-2017 |
| US-SRM | 31.82 | -110.87 | SAV | bsk | 2004-2014 |
| US-Sta | 41.40 | -106.80 | SHR | bsh | 2005-2009 |
| US-Ton | 38.43 | -120.97 | SAV | csa | 2001-2014 |
| US-Tw3 | 38.12 | -121.65 | CRO | csa | 2013-2014 |
| US-Var | 38.41 | -120.95 | GRA | csa | 2001-2014 |

---

|        |        |         |     |     |           |
|--------|--------|---------|-----|-----|-----------|
| US-Whs | 31.74  | -110.05 | SHR | bsk | 2007-2014 |
| US-Wkg | 31.74  | -109.94 | GRA | bsk | 2004-2014 |
| ZA-Kru | -25.02 | 31.50   | SAV | cwa | 2000-2013 |

**Table S2.** Temporal dynamics of  $\theta_{\text{crit}}$ ,  $S$  and  $EF_{\text{max}}$  at DE-Hai. The standard error values are shown in parenthesis. NA means no  $\theta_{\text{crit}}$  estimated.

| Year      | $\theta_{\text{crit}}$ | $S$          | $EF_{\text{max}}$ |
|-----------|------------------------|--------------|-------------------|
| 2000-2002 | 22.10 (0.59)           | 0.05 (0.01)  | 0.59 (0.01)       |
| 2003-2005 | 20.17 (0.47)           | 0.06 (0.01)  | 0.54 (0.01)       |
| 2006-2008 | 24.86 (2.06)           | 0.01 (0.01)  | 0.60 (0.01)       |
| 2009-2011 | NA                     | NA           | NA                |
| 2012-2014 | NA                     | NA           | NA                |
| 2015-2017 | NA                     | NA           | NA                |
| 2018-2019 | 26.23 (1.28)           | 0.03 (0.004) | 0.52 (0.02)       |
| Mean      | 23.34 (1.36)           | 0.04 (0.01)  | 0.56 (0.02)       |
| 2000-2019 | 24.17 (0.46)           | 0.03 (0.003) | 0.55 (0.01)       |
